# Supplementary material
Source: PubMed Central journal article supplement (PMC8240761)

# CAREGIVER EMPATHY

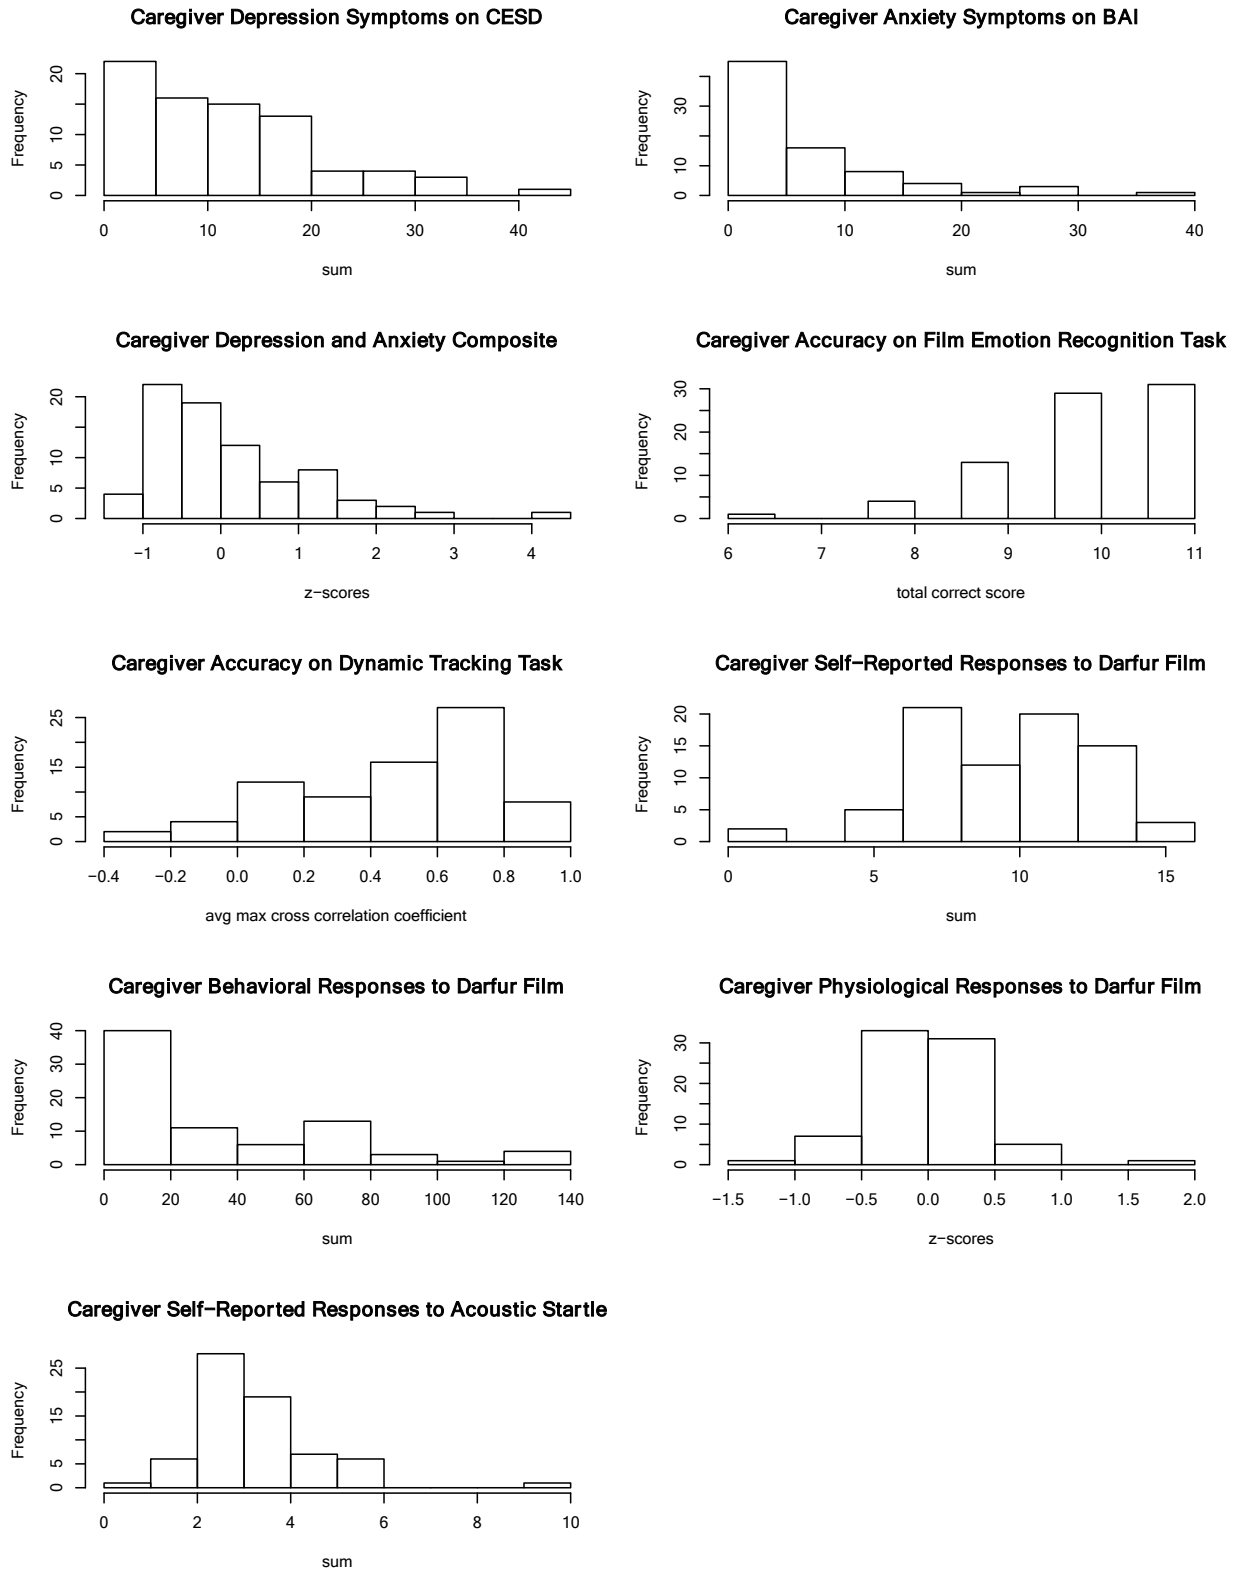

**Supplemental Figure 1.** Distributions of measures.

Supplement: NIHMS1642048-supplement-1.pdf [file NIHMS1642048-supplement-1.pdf]
